# Supplementary material for: Bacterial Abundance and Physicochemical Characteristics of Water and Sediment Associated with Hydroelectric Dam on the Lancang River China
Source: PubMed Central journal article supplement (PMC6603985; doi:10.3390/ijerph16112031), 2019-06-07
Supplement: ijerph-16-02031-s001.pdf [file ijerph-16-02031-s001.pdf]

Table S1. Summary of Gongguoqiao hydroelectric dam operation condition and rainfall distribution

| Season | Outflow at the time of sampling (m <sup>3</sup> ·s <sup>-1</sup> ) | Mean head-water level (m) | Mean reservoir water level (m) | Reservoir storage capacity (10 <sup>4</sup> ·m <sup>3</sup> ) | Cumulative water flow (10 <sup>4</sup> ·m <sup>3</sup> ) |         |         |                  |               | Mean 7-day rainfall before sampling (mm) |
|--------|--------------------------------------------------------------------|---------------------------|--------------------------------|---------------------------------------------------------------|----------------------------------------------------------|---------|---------|------------------|---------------|------------------------------------------|
|        |                                                                    |                           |                                |                                                               | Inflow                                                   | Storage | Outflow | Power generation | Discard water |                                          |
| Dry    | 267                                                                | 61.5                      | 1303.8                         | 27248                                                         | 2565                                                     | 581     | 1984    | 1984             | 0             | 0                                        |
| Normal | 524.18                                                             | 60.54                     | 1304                           | 27237                                                         | 5496                                                     | 268     | 5228    | 5228             | 0             | 11.2                                     |
| Wet    | 2268.33                                                            | 56.08                     | 1305.3                         | 27400                                                         | 19597                                                    | 1519    | 17078   | 12165            | 4915          | 17.8                                     |

**Table S2.** Summary of sampling depth, time and number of samples taken on each research site

| Season (Time)    | Site                | Depth (m) | No. of samples taken |   |
|------------------|---------------------|-----------|----------------------|---|
| Water            | Dry (January, 2017) | 0.2       | 3                    |   |
|                  |                     | S1        | 18.5                 | 3 |
|                  |                     |           | 37.5                 | 3 |
|                  |                     | S2        | 0.2                  | 3 |
|                  |                     | S3        | 0.2                  | 3 |
|                  |                     | S4        | 0.2                  | 3 |
|                  | Normal (May, 2017)  |           | 0.2                  | 3 |
|                  |                     | S1        | 21.0                 | 3 |
|                  |                     |           | 42.5                 | 3 |
|                  |                     | S2        | 0.2                  | 3 |
|                  |                     | S3        | 0.2                  | 3 |
|                  |                     | S4        | 0.2                  | 3 |
| Wet (July, 2017) |                     | 0.2       | 3                    |   |
|                  | S1                  | 7.0       | 3                    |   |
|                  |                     | 14.2      | 3                    |   |
|                  | S2                  | 0.2       | 3                    |   |
|                  | S3                  | 0.2       | 3                    |   |
|                  | S4                  | 0.2       | 3                    |   |
| Sediment         | Dry (January, 2017) | S1        | 0.1                  | 3 |
|                  |                     | S2        | 0.1                  | 3 |
|                  |                     | S3        | 0.1                  | 3 |
|                  |                     | S4        | 0.1                  | 3 |
|                  | Normal (May, 2017)  | S1        | 0.1                  | 3 |
|                  |                     | S2        | 0.1                  | 3 |
|                  |                     | S3        | 0.1                  | 3 |
|                  |                     | S4        | 0.1                  | 3 |
|                  | Wet (July, 2017)    | S1        | 0.1                  | 3 |
|                  |                     | S2        | 0.1                  | 3 |
|                  |                     | S3        | 0.1                  | 3 |
|                  |                     | S4        | 0.1                  | 3 |

**Table S3.** Raw data of physical and chemical characteristics in water upstream and downstream of Gongguoqiao hydroelectric dam

| Site          | Temperature<br>(°C) | pH   | DO<br>(mg·L <sup>-1</sup> ) | ORP<br>(mV) | EC<br>(μS·cm <sup>-1</sup> ) | Turbidity<br>(NTU) | Chl a<br>(μg·L <sup>-1</sup> ) | TDS<br>(g·L <sup>-1</sup> ) | TN<br>(mg·L <sup>-1</sup> ) | TP<br>(mg·L <sup>-1</sup> ) | Bacterial<br>abundance<br>(×10 <sup>6</sup><br>cell·mL <sup>-1</sup> ) |
|---------------|---------------------|------|-----------------------------|-------------|------------------------------|--------------------|--------------------------------|-----------------------------|-----------------------------|-----------------------------|------------------------------------------------------------------------|
| Dry season    |                     |      |                             |             |                              |                    |                                |                             |                             |                             |                                                                        |
| S1①           | 10.88               | 8.15 | 16.92                       | 244         | 48.3                         | 92.4               | 2.2 <sup>1</sup>               | 0.320                       | 1.476                       | 0.026                       | 2.88                                                                   |
| S1②           | 10.83               | 7.7  | 16.17                       | 244         | 46.30                        | 94.1               |                                | 0.320                       | 1.617                       | 0.022                       | 2.86                                                                   |
| S1③           | 11.22               | 8.23 | 14.56                       | 234         | 51.3                         | 68.4               |                                | 0.328                       | 1.546                       | 0.024                       | 2.87                                                                   |
| S2①           | 12.99               | 8.05 | 19.92                       | 199         | 48.3                         | 85.9               | 1.3 <sup>1</sup>               | 0.314                       | 1.420                       | 0.026                       | 0.40                                                                   |
| S2②           | 11.4                | 7.89 | 17.01                       | 202         | 48.50                        | 87.5               |                                | 0.314                       | 1.575                       | 0.042                       | 0.16                                                                   |
| S2③           | 10.59               | 8.09 | 14.06                       | 220         | 50.5                         | 83.2               |                                | 0.323                       | 1.497                       | 0.034                       | 0.28                                                                   |
| S3①           | 10.99               | 8.1  | 14.75                       | 222         | 50.5                         | 110.0              | 1.4 <sup>1</sup>               | 0.323                       | 1.715                       | 0.026                       | 0.93                                                                   |
| S3②           | 10.1                | 8.13 | 14.31                       | 225         | 51.20                        | 96.6               |                                | 0.328                       | 1.673                       | 0.026                       | 0.91                                                                   |
| S3③           | 9.75                | 8.15 | 13.67                       | 227         | 51.6                         | 91.6               |                                | 0.330                       | 1.694                       | 0.026                       | 0.92                                                                   |
| S4①           | 12.97               | 8.4  | 12.94                       | 199         | 42                           | 9645.0             | 2.9 <sup>1</sup>               | 0.273                       | 1.490                       | 0.102                       | 0.47                                                                   |
| S4②           | 13.25               | 8.03 | 10.95                       | 185         | 41.80                        | 10980.0            |                                | 0.272                       | 1.589                       | 0.115                       | 0.49                                                                   |
| S4③           | 13.11               | 8.15 | 10.23                       | 208         | 41.7                         | 10275.0            |                                | 0.271                       | 1.392                       | 0.088                       | 0.45                                                                   |
| Normal season |                     |      |                             |             |                              |                    |                                |                             |                             |                             |                                                                        |
| S1①           | 18.64               | 7.64 | 12.93                       | 273         | 40.3                         | 158.0              | 1.19                           | 0.262                       | 1.318                       | 0.059                       | 2.54                                                                   |
| S1②           | 17.49               | 7.57 | 11.09                       | 289         | 40.60                        | 159.0              | 1.34                           | 0.264                       | 1.864                       | 0.059                       | 0.70                                                                   |
| S1③           | 17.89               | 7.55 | 10.13                       | 292         | 40.7                         | 159.0              | 1.19                           | 0.264                       | 1.341                       | 0.059                       | 1.62                                                                   |
| S2①           | 20.91               | 7.46 | 7.99                        | 241         | 42.1                         | 168.0              | 1.18                           | 0.274                       | 1.376                       | 0.158                       | 0.59                                                                   |
| S2②           | 21.06               | 7.38 | 7.47                        | 267         | 41.90                        | 169.0              | 1.17                           | 0.273                       | 1.028                       | 0.059                       | 0.77                                                                   |
| S2③           | 21.15               | 7.35 | 6.8                         | 295         | 41.9                         | 174.0              | 1.22                           | 0.273                       | 1.516                       | 0.207                       | 0.40                                                                   |
| S3①           | 18.96               | 7.3  | 8.31                        | 283         | 41                           | 182.0              | 1.48                           | 0.267                       | 1.446                       | 0.108                       | 1.74                                                                   |
| S3②           | 17.62               | 7.3  | 8.47                        | 219         | 40.80                        | 219.0              | 1.51                           | 0.265                       | 1.446                       | 0.207                       | 2.06                                                                   |
| S3③           | 17.31               | 7.34 | 7.67                        | 285         | 41.4                         | 191.0              | 1.57                           | 0.269                       | 1.341                       | 0.158                       | 1.43                                                                   |
| S4①           | 18.09               | 7.07 | 8.33                        | 313         | 40.6                         | 184.0              | 1.32                           | 0.264                       | 1.423                       | 0.700                       | 0.76                                                                   |
| S4②           | 17.47               | 7.08 | 8.48                        | 315         | 40.90                        | 185.0              | 1.38                           | 0.266                       | 1.376                       | 0.946                       | 1.04                                                                   |
| S4③           | 16.75               | 7.31 | 8.72                        | 300         | 40.9                         | 187.0              | 1.36                           | 0.266                       | 1.702                       | 0.897                       | 0.47                                                                   |
| Wet season    |                     |      |                             |             |                              |                    |                                |                             |                             |                             |                                                                        |
| S1①           | 19.77               | 6.52 | 4.01                        | 360         | 31.8                         | 794                | 3.09                           | 0.207                       | 0.306                       | 0.083                       | 0.05                                                                   |

|     |       |      |      |     |      |        |      |       |       |       |      |
|-----|-------|------|------|-----|------|--------|------|-------|-------|-------|------|
| S1② | 18.79 | 6.49 | 4.02 | 360 | 32.2 | 575    | 3.58 | 0.209 | 0.425 | 0.113 | 0.05 |
| S1③ | 18.91 | 6.5  | 3.91 | 360 | 32.3 | 508    | 3.15 | 0.21  | 0.575 | 0.098 | 0.04 |
| S2① | 20.62 | 7.43 | 3.88 | 290 | 32.6 | 1725   | 1.35 | 0.211 | 0.246 | 0.053 | 0.22 |
| S2② | 18.08 | 7.65 | 3.91 | 282 | 32.8 | 1695   | 1.37 | 0.213 | 0.261 | 0.193 | 0.29 |
| S2③ | 22.36 | 7.56 | 4.56 | 295 | 32   | 1725   | 1.47 | 0.208 | 0.246 | 0.049 | 0.15 |
| S3① | 21.9  | 7.66 | 5.37 | 286 | 31.2 | 2775   | 1.26 | 0.203 | 0.455 | 0.071 | 0.24 |
| S3② | 20.1  | 7.66 | 5.58 | 286 | 31.6 | 2962.5 | 1.22 | 0.205 | 0.142 | 0.056 | 0.14 |
| S3③ | 18.02 | 7.64 | 5.29 | 286 | 32.7 | 2857.5 | 1.24 | 0.213 | 0.560 | 0.064 | 0.35 |
| S4① | 19.99 | 6.39 | 3.21 | 347 | 30.7 | 1813.3 | 1.31 | 0.200 | 0.276 | 0.245 | 0.26 |
| S4② | 18.95 | 6.44 | 3.33 | 346 | 31.2 | 1826.7 | 1.37 | 0.203 | 0.276 | 0.234 | 0.20 |
| S4③ | 18.72 | 6.46 | 3.34 | 349 | 31.3 | 1806.7 | 1.28 | 0.204 | 0.440 | 0.240 | 0.33 |

<sup>1</sup>Only one sample was measured.

**Table S4.** Raw data of physical and chemical characteristics in sediment upstream and downstream of Gongguoqiao hydroelectric dam<sup>1</sup>

| Site          | WC (%) | OM (%) | TN (mg·gDW <sup>-1</sup> ) | TP (mg·gDW <sup>-1</sup> ) | Microbial activity (μg FDA·g <sup>-1</sup> DW·h <sup>-1</sup> ) | Bacterial abundance (×10 <sup>7</sup> cell·gDW <sup>-1</sup> ) |
|---------------|--------|--------|----------------------------|----------------------------|-----------------------------------------------------------------|----------------------------------------------------------------|
| Dry season    |        |        |                            |                            |                                                                 |                                                                |
| S1①           | 53.70  | 5.20   | 5.59                       | 3.52                       | 2.544                                                           | 5.94                                                           |
| S1②           | 47.98  | 0.28   | 5.13                       | 5.14                       | 2.544                                                           | 6.36                                                           |
| S1③           | 50.84  | 2.74   | 5.36                       | 4.33                       | 2.544                                                           | 5.53                                                           |
| S2①           | 76.16  | 0.95   | 5.01                       | 2.55                       | 2.022                                                           | 1.40                                                           |
| S2②           | 82.72  | 0.73   | 4.67                       | 2.45                       | 1.930                                                           | 1.43                                                           |
| S2③           | 79.44  | 0.84   | 4.84                       | 2.50                       | 1.976                                                           | 1.36                                                           |
| S3①           | 66.45  | 1.62   | 5.15                       | 2.45                       | 1.762                                                           | 3.16                                                           |
| S3②           | 71.49  | 1.26   | 4.83                       | 2.56                       | 1.375                                                           | 2.38                                                           |
| S3③           | 68.97  | 1.44   | 4.99                       | 2.50                       | 1.568                                                           | 3.94                                                           |
| S4①           | 66.02  | 5.08   | 5.80                       | 3.97                       | 3.166                                                           | 8.30                                                           |
| S4②           | 65.51  | 2.21   | 5.70                       | 3.88                       | 4.481                                                           | 10.08                                                          |
| S4③           | 65.77  | 3.64   | 5.75                       | 3.92                       | 3.823                                                           | 6.52                                                           |
| Normal season |        |        |                            |                            |                                                                 |                                                                |
| S1①           | 49.06  | 11.50  | 4.23                       | 5.23                       | 1.578                                                           | 8.24                                                           |
| S1②           | 61.31  | 14.43  | 4.36                       | 6.08                       | 1.839                                                           | 7.23                                                           |
| S1③           | 55.18  | 12.96  | 4.29                       | 5.66                       | 1.708                                                           | 9.24                                                           |
| S2①           | 84.03  | 2.22   | 3.52                       | 3.65                       | 0.356                                                           | 1.91                                                           |
| S2②           | 74.37  | 2.94   | 3.39                       | 4.05                       | 0.283                                                           | 1.60                                                           |
| S2③           | 79.20  | 2.58   | 3.45                       | 3.85                       | 0.319                                                           | 2.21                                                           |
| S3①           | 61.17  | 4.50   | 4.29                       | 6.08                       | 1.037                                                           | 7.31                                                           |
| S3②           | 68.54  | 5.38   | 4.08                       | 5.66                       | 0.557                                                           | 8.00                                                           |
| S3③           | 64.86  | 4.94   | 4.19                       | 5.87                       | 0.797                                                           | 6.64                                                           |
| S4①           | 65.28  | 2.62   | 4.78                       | 8.18                       | 0.716                                                           | 6.33                                                           |
| S4②           | 70.71  | 2.62   | 4.20                       | 8.25                       | 0.540                                                           | 9.76                                                           |

---

|            |       |      |      |      |       |      |
|------------|-------|------|------|------|-------|------|
| S4③        | 68.00 | 2.62 | 4.49 | 8.22 | 0.628 | 2.90 |
| Wet season |       |      |      |      |       |      |
| S1①        | 58.97 | 2.08 | 4.51 | 0.91 | 0.531 | 1.76 |
| S1②        | 53.28 | 2.35 | 0.31 | 0.87 | 0.656 | 1.42 |
| S1③        | 56.12 | 2.22 | 2.41 | 0.89 | 0.593 | 2.10 |
| S2①        | 80.46 | 1.07 | 2.73 | 0.53 | 0.643 | 1.82 |
| S2②        | 79.17 | 1.26 | 0.73 | 0.53 | 1.014 | 1.92 |
| S2③        | 79.82 | 1.16 | 1.73 | 0.53 | 0.828 | 1.72 |
| S3①        | 76.74 | 0.82 | 5.19 | 0.55 | 0.397 | 1.61 |
| S3②        | 76.88 | 0.88 | 5.13 | 0.71 | 0.731 | 0.66 |
| S3③        | 76.81 | 0.85 | 5.16 | 0.63 | 0.564 | 2.56 |
| S4①        | 67.10 | 1.79 | 3.80 | 0.71 | 0.805 | 2.77 |
| S4②        | 66.76 | 1.27 | 4.46 | 0.93 | 0.455 | 2.36 |
| S4③        | 66.93 | 1.53 | 4.13 | 0.82 | 0.630 | 3.19 |

---

**Table S5.** Physical and chemical characteristics at different depths in Gongguoqiao reservoir<sup>1,2</sup>

| Site          | Temperature (°C) | pH      | DO (mg·L <sup>-1</sup> ) | ORP (mV)   | EC (μS·cm <sup>-1</sup> ) | Turbidity (NTU) | Algae Biomass (μg·L <sup>-1</sup> ) | TDS (g·L <sup>-1</sup> ) | TN (mg·L <sup>-1</sup> ) | TP (mg·L <sup>-1</sup> ) | Bacterial abundance (×10 <sup>6</sup> cell·mL <sup>-1</sup> ) |
|---------------|------------------|---------|--------------------------|------------|---------------------------|-----------------|-------------------------------------|--------------------------|--------------------------|--------------------------|---------------------------------------------------------------|
| Dry season    |                  |         |                          |            |                           |                 |                                     |                          |                          |                          |                                                               |
| S1T           | 11.0±0.2         | 8.0±0.2 | 15.9±1.0                 | 240.7±4.7  | 48.6±2.1                  | 84.9±11.7       | 2.3±0.1                             | 0.3±0.0                  | 1.5±0.1                  | 0.02±0.00                | 2.87±0.01                                                     |
| S1M           | 9.73±0.5         | 7.7±0.3 | 14.7±0.1                 | 245.0±0.0  | 49.9±1.0                  | 87.2±2.3        | 1.7±0.0                             | 0.3±0.0                  | 1.3±0.1                  | 0.02±0.01                | 0.55±0.11                                                     |
| S1B           | 9.52±0.2         | 7.0±0.0 | 13.7±0.2                 | 234.0±0.0  | 51.3±0.5                  | 88.4±3.6        | 1.5±0.0                             | 0.3±0.0                  | 1.3±0.1                  | 0.01±0.00                | 0.22±0.04                                                     |
| Normal season |                  |         |                          |            |                           |                 |                                     |                          |                          |                          |                                                               |
| S1T           | 18.0±0.5         | 7.6±0.0 | 11.4±1.2                 | 284.7±8.3  | 40.5±0.2                  | 158.7±0.5       | 1.2±0.3                             | 0.3±0.0                  | 1.5±0.3                  | 0.06±0.00                | 1.62±0.76                                                     |
| S1M           | 16.2±0.1         | 7.6±0.0 | 10.4±0.4                 | 304.7±3.7  | 42.0±0.5                  | 173.7±1.2       | 0.8±0.0                             | 0.3±0.0                  | 0.7±0.1                  | 0.06±0.00                | 4.69±0.62                                                     |
| S1B           | 15.8±0.1         | 7.5±0.0 | 9.3±0.3                  | 306.7±2.6  | 42.3±0.3                  | 176.0±5.0       | 1.0±0.0                             | 0.3±0.0                  | 4.9±1.0                  | 0.10±0.00                | 0.68±0.01                                                     |
| Wet season    |                  |         |                          |            |                           |                 |                                     |                          |                          |                          |                                                               |
| S1T           | 19.2±0.4         | 6.5±0.0 | 4.0±0.0                  | 360.0±0.0  | 32.1±0.2                  | 625.7±122.1     | 3.3±0.3                             | 0.2±0.0                  | 0.4±0.1                  | 0.10±0.01                | 0.05±0.01                                                     |
| S1M           | 18.7±0.2         | 6.4±0.0 | 4.1±0.2                  | 349.7±12.5 | 32.5±0.1                  | 1,826.7±70.8    | 1.5±0.1                             | 0.2±0.0                  | 0.6±0.1                  | 0.29±0.01                | 0.55±0.11                                                     |
| S1B           | 16.74±1.3        | 6.4±0.0 | 4.0±0.0                  | 342.3±3.7  | 32.3±0.0                  | 637±291.5       | 8.4±0.7                             | 0.2±0.0                  | 0.3±0.0                  | 0.21±0.06                | 0.22±0.04                                                     |

<sup>1</sup>Values are means ± standard deviation on mean, n=3

<sup>2</sup>S1T, S1M, and S1B represent the top, middle and bottom layer at the dam reservoir (i.e., site S1), respectively.

**Table S6.** Effects of water depth (top, middle and bottom) and sampling season (dry, normal and wet) on the physicochemical characteristics of water in the dam reservoir by means of repeated measures ANOVA. NS: no significant effect at p=0.05.

| Depth (D) | Sampling season (Ss) | D × Ss |
|-----------|----------------------|--------|
|-----------|----------------------|--------|

|                                                                  | <b>F</b> | <b><i>p</i></b>     | <b>F</b> | <b><i>p</i></b> | <b>F</b> | <b><i>p</i></b>     |
|------------------------------------------------------------------|----------|---------------------|----------|-----------------|----------|---------------------|
| Temperature (°C)                                                 | 52.05    | <0.01               | 830.93   | <0.01           | 5.08     | 0.012               |
| pH                                                               | 13.53    | <0.01               | 282.82   | <0.01           | 9.35     | <0.01               |
| DO (mg·L <sup>-1</sup> )                                         | 14.43    | <0.01               | 352.70   | <0.01           | 3.60     | 0.038               |
| ORP (mV)                                                         | 1.79     | 0.209 <sup>NS</sup> | 513.72   | <0.01           | 7.97     | 0.002               |
| EC (μS·cm <sup>-1</sup> )                                        | 4.69     | 0.031               | 826.03   | <0.01           | 0.88     | 0.505 <sup>NS</sup> |
| Turbidity (NTU)                                                  | 42.91    | <0.01               | 81.81    | <0.01           | 41.82    | <0.01               |
| Chl a (μg·L <sup>-1</sup> )                                      | 420.94   | <0.01               | 417.32   | <0.01           | 463.58   | <0.01               |
| TDS (g·L <sup>-1</sup> )                                         | 233.72   | <0.01               | 3292.01  | <0.01           | 140.76   | <0.01               |
| TN (mg·L <sup>-1</sup> )                                         | 17.90    | <0.01               | 45.02    | <0.01           | 24.05    | <0.01               |
| TP (mg·L <sup>-1</sup> )                                         | 12.33    | <0.01               | 103.50   | <0.01           | 12.72    | <0.01               |
| Bacterial abundance<br>(×10 <sup>6</sup> cell·mL <sup>-1</sup> ) | 68.66    | <0.01               | 30.08    | <0.01           | 81.12    | <0.01               |
